# Supplementary material for: Yiqihuoxue Formula Activates Autophagy and Offers Renoprotection in a Rat Model of Adenine-Induced Kidney Disease
Source: Hindawi journal article supplement (doi:10.1155/2019/3423981), 2019-12-26
Supplement: f1 [file 3423981.f1.pdf]

**Supplementary Table 1. Semiquantitative criteria for IHC analysis**

| Degree | $\alpha$ -SMA                         | Col-1                            | TGF- $\beta$ 1                   |
|--------|---------------------------------------|----------------------------------|----------------------------------|
| 0      | 5% $\leq$ area of interstitial field  | 5% $\leq$ area of cortex region  | 5% $\leq$ area of cortex region  |
| 1      | 6% - 25% area of interstitial field   | 6% - 30% area of cortex region   | 6% - 30% area of cortex region   |
| 2      | 26% -50% area of interstitial field   | 31% - 60% area of cortex region  | 31% - 60% area of cortex region  |
| 3      | $\geq$ 51% area of interstitial field | $\geq$ 61% area of cortex region | $\geq$ 61% area of cortex region |

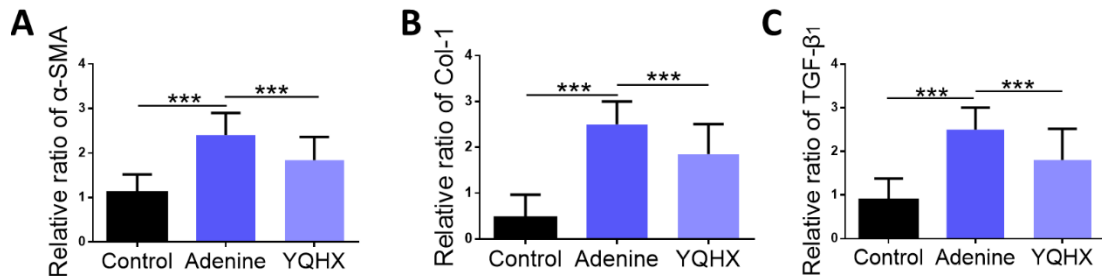

**Supplementary Figure. 1 YQHX treatment reduced the expression of renal fibrosis-related proteins.** (A–C) The assessment results of immunohistochemistry staining showing increased protein levels of  $\alpha$ -SMA, Col-I, and TGF- $\beta$ 1 in the adenine group, which were decreased by the YQHX treatment. The number of rats per group was 5, and 10 pictures were taken from each rat. \*\*\*p < 0.001. Adenine group, adenine-induced kidney disease rat; YQHX, yiqihuoxue group.
